# Supplementary material for: Targeting ASCT2-mediated glutamine metabolism inhibits proliferation and promotes apoptosis of pancreatic cancer cells
Source: Oxford University Press journal article supplement (doi:10.1042/bsr20212171), 2022-03-01
Supplement: bsr-2021-2171_supp.pdf [file bsr-2021-2171_supp.pdf]

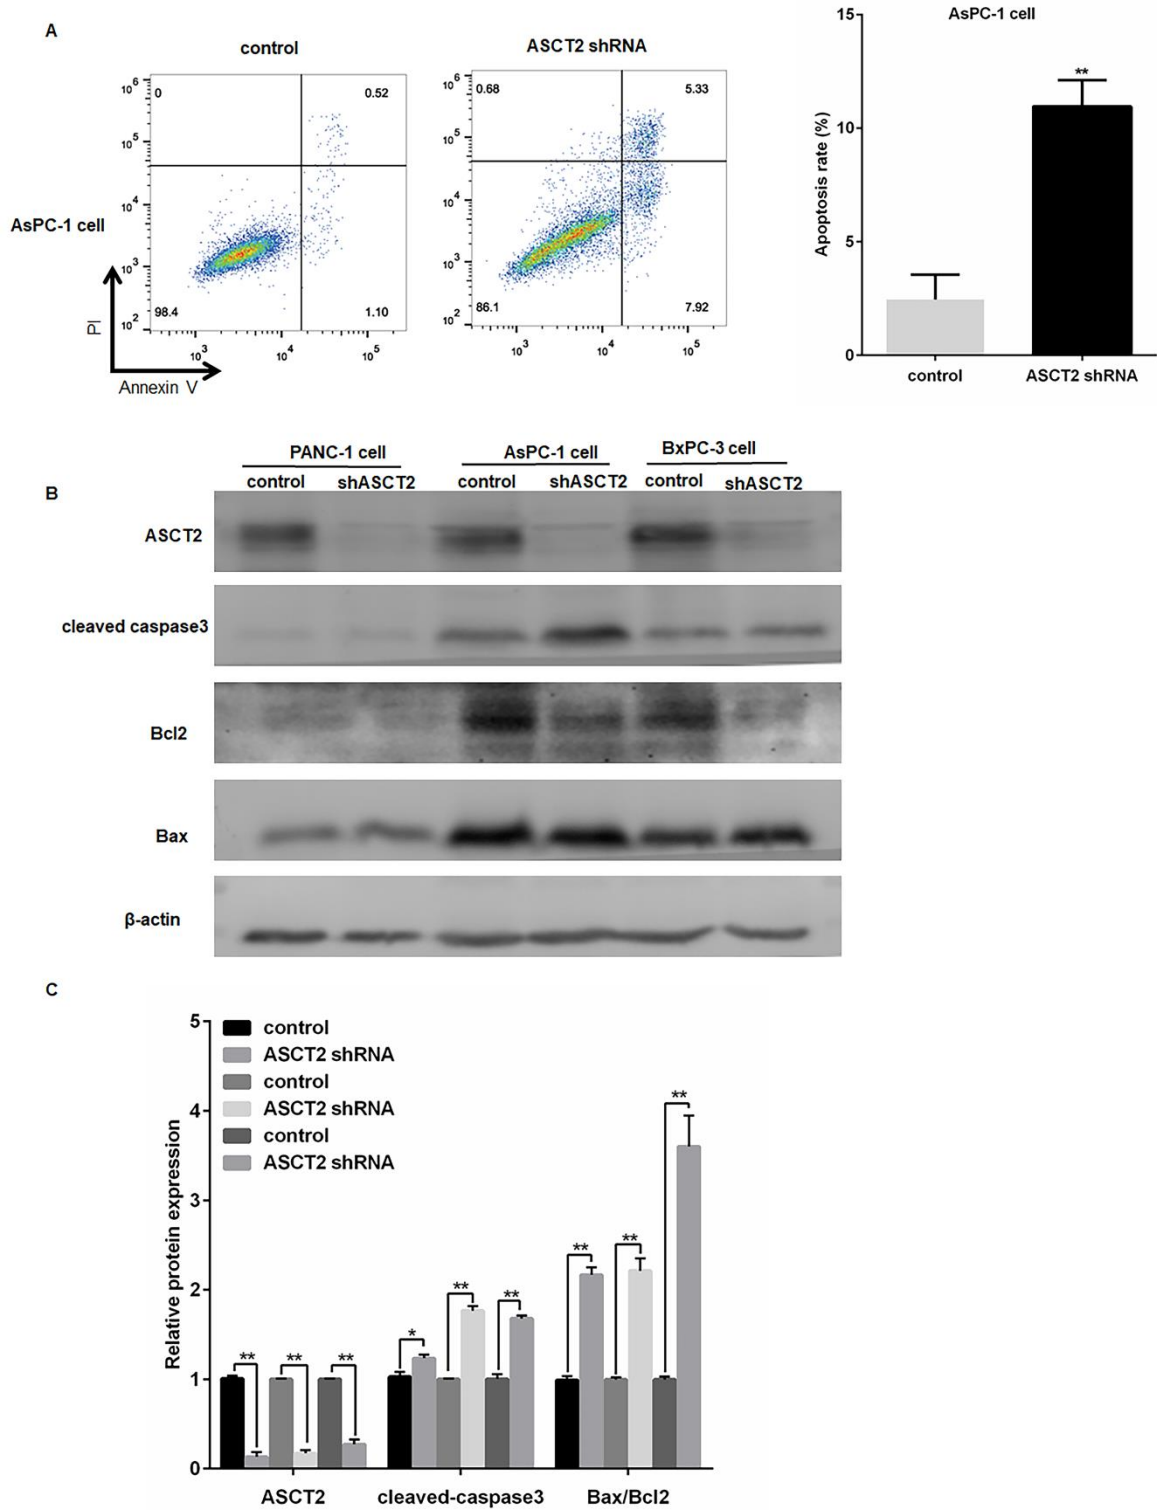

**Figure S1.** Effect of ASCT2 knockdown on cell apoptosis. (A) The rate of cell apoptosis was detected through flow cytometry in AsPC1 cells upon ASCT2 knockdown. (B-C) BxPC3, PANC-1 and AsPC1 cells were respectively infected with a control or ASCT2 lentiviral shRNA. A Western blot analysis of the expressions of Bcl-2, Bax and cleavage-caspase 3 proteins.  $\beta$ -actin was used as the loading control. \* $P < 0.05$ , \*\* $P < 0.01$ , versus the control group.

Supplementary Table 1      Primer sequences used in the study.

| primer name      | sequence (5' to 3')  |
|------------------|----------------------|
| qPCR primers     |                      |
| ASCT2 F          | GCAGTCCTTGGACTTCGTA  |
| ASCT2 R          | ATGATGGCCAGAGTGAGGAC |
| $\beta$ -actin F | AGCCTCGCCTTTGCCGA    |
| $\beta$ -actin R | GCGCGGCGATATCATCATC  |

**Supplementary Table 2 Antibody used in the study.**

| Name                                            | Cat.No. | antibody dilutions | Source/Isotype | MW (kDa) |
|-------------------------------------------------|---------|--------------------|----------------|----------|
| ASCT2 (D7C12) Rabbit mAb                        | 8057    | 1:1000             | Rabbit         | 49, 75   |
| Bcl-2 (D55G8) Rabbit mAb                        | 4223    | 1:1000             | Rabbit         | 26       |
| Bax                                             | 2772    | 1:1000             | Rabbit         | 20       |
| Akt                                             | 9272    | 1:1000             | Rabbit         | 60       |
| Phospho-Akt (Ser473) (D9E) XP®<br>Rabbit mAb    | 4060    | 1:1000             | Rabbit         | 60       |
| p70 S6 Kinase (49D7) Rabbit mAb                 | 2708    | 1:1000             | Rabbit         | 70, 85   |
| Phospho-p70 S6 Kinase (Thr389)<br>Antibody      | 9205    | 1:1000             | Rabbit         | 70, 85   |
| 4E-BP1 (53H11) Rabbit mAb                       | 9644    | 1:1000             | Rabbit         | 15-20    |
| Phospho-4E-BP1 (Thr37/46) (236B4)<br>Rabbit mAb | 2855    | 1:1000             | Rabbit         | 15-20    |
| Cleaved Caspase-3 (Asp175) (5A1E)<br>Rabbit mAb | 9664    | 1:1000             | Rabbit         | 17, 19   |
| $\beta$ -Actin (D6A8) Rabbit mAb                | 8457    | 1:1000             | Rabbit         | 45       |
| Anti-rabbit IgG, HRP-linked Antibody            | 7074    | 1:1000             | Goat           |          |
